# Supplementary material for: Development of a Rainbow Trout (Oncorhynchus mykiss) Intestinal In Vitro Platform for Profiling Amino Acid Digestion and Absorption of a Complete Diet
Source: MDPI journal article supplement (doi:10.3390/ani13142278), 2023-07-12
Supplement: s1 [file s1]

**Table S1.** List of primer sequences used for gene expression analysis. Gene ID, amplicon size in base pairs (bp), accession number ID, forward and reverse primer sequences, annealing temperature are reported for each gene.

| Gene ID<br>(amplicon size in<br>base pairs (bp)) | Accession Number<br>ID | Forward (F) and reverse (R) Primer<br>Sequence (5->3) | Annealing<br>Temperature<br>(°C) | Reference  |
|--------------------------------------------------|------------------------|-------------------------------------------------------|----------------------------------|------------|
| <i>lpep</i> (100 bp)                             | XM_036972002.1         | F: CTTTGACAGTGGTGGGATCA<br>R: TGTGACGATGGCGGAAC       | 60                               | Own Design |
| <i>anpep</i> (139 pb)                            | XM_021568270.2         | F: GGAATGACCTGTGGCTGAAT<br>R: GCCAACGAATCCACTTGAAAC   | 60                               | Own Design |
| <i>iap</i> (157 bp)                              | XM_021606337           | F: TTGGCACGGAAAGAGAGTCC<br>R: CATGGGAAAGCTACCAGGCA    | 60                               | Own Design |

**Table S2.** *a*: Amino acid amount (µg) detected in the apical (AP) and basolateral (BL) compartment of ThinCert inserts after **6 hours** of exposure to bio-available fraction (BAF) in the different culturing conditions. RTdiMI (RTDI) and RTpiMI (RTPI) cell lines were exposed to 25% or 50% BAF diluted in L15/ex medium supplemented with 4% BSA or without any supplementation (no BSA). The same conditions were also used on control samples without cells (NC).

| BSA         | BSA      | BSA       | BSA       | BSA       | BSA       | BSA       | No BSA | No BSA | No BSA | No BSA | No BSA | No BSA | BSA       | BSA       | BSA       | BSA       | BSA       | BSA       | No BSA | No BSA | No BSA | No BSA | No BSA | No BSA |
|-------------|----------|-----------|-----------|-----------|-----------|-----------|--------|--------|--------|--------|--------|--------|-----------|-----------|-----------|-----------|-----------|-----------|--------|--------|--------|--------|--------|--------|
| %BAF        | 25       | 25        | 25        | 25        | 25        | 25        | 25     | 25     | 25     | 25     | 25     | 25     | 50        | 50        | 50        | 50        | 50        | 50        | 50     | 50     | 50     | 50     | 50     | 50     |
| Cells       | NC       | RTDI      | RTPI      | NC        | RTDI      | RTPI      | NC     | RTDI   | RTPI   | NC     | RTDI   | RTPI   | NC        | RTDI      | RTPI      | NC        | RTDI      | RTPI      | NC     | RTDI   | RTPI   | NC     | RTDI   | RTPI   |
| Compartment | AP       | AP        | AP        | BL        | BL        | BL        | AP     | AP     | AP     | BL     | BL     | BL     | AP        | AP        | AP        | BL        | BL        | BL        | AP     | AP     | AP     | BL     | BL     | BL     |
| L-Alanine   | 7,9<br>0 | 18,2<br>8 | 15,2<br>8 | 11,9<br>6 | 17,1<br>3 | 14,1<br>0 | 6,65   | 16,68  | 12,69  | 9,64   | 17,13  | 14,10  | 11,1<br>5 | 27,5<br>9 | 26,6<br>4 | 17,8<br>3 | 28,7<br>1 | 24,5<br>6 | 18,34  | 28,18  | 23,99  | 34,82  | 13,55  | 23,96  |
|             | 8,0<br>0 | 16,6<br>1 | 14,3<br>5 | 13,5<br>0 | 15,4<br>8 | 13,5<br>4 | 7,00   | 19,79  | 10,93  | 10,00  | 15,48  | 13,55  | 12,5<br>0 | 27,4<br>2 | 27,6<br>8 | 18,0<br>0 | 29,5<br>5 | 25,7<br>8 | 20,00  | 26,51  | 25,16  | 37,00  | 12,96  | 25,38  |
|             | 7,9<br>5 | 16,8<br>7 | 13,6<br>7 | 12,7<br>3 | 14,1<br>0 | 14,5<br>6 | 6,83   | 16,91  | 11,41  | 9,82   | 14,10  | 10,25  | 11,8<br>3 | 28,3<br>7 | 28,3<br>7 | 17,9<br>1 | 27,5<br>1 | 27,1<br>5 | 19,17  | 26,03  | 27,70  | 35,91  | 12,36  | 23,95  |
| L-Arginine  | 4,6<br>8 | 10,1<br>4 | 7,43      | 6,64      | 9,09      | 6,64      | 5,46   | 9,43   | 7,07   | 5,77   | 9,09   | 7,50   | 4,49      | 17,7<br>1 | 12,5<br>3 | 4,19      | 13,7<br>8 | 11,1<br>2 | 12,13  | 15,16  | 13,37  | 19,51  | 12,09  | 12,94  |
|             | 4,8<br>0 | 8,14      | 6,48      | 7,00      | 7,08      | 6,84      | 5,50   | 17,45  | 8,77   | 6,00   | 7,08   | 9,60   | 5,00      | 12,5<br>9 | 12,4<br>7 | 5,00      | 9,93      | 11,9<br>4 | 13,00  | 15,60  | 13,18  | 20,00  | 11,98  | 12,50  |
|             | 4,7<br>4 | 11,2<br>9 | 9,01      | 6,82      | 8,38      | 8,91      | 5,48   | 11,37  | 10,60  | 5,88   | 8,38   | 9,13   | 4,74      | 14,0<br>3 | 11,8<br>3 | 4,59      | 11,5<br>3 | 11,1<br>3 | 12,56  | 13,18  | 13,29  | 19,75  | 11,45  | 12,24  |
| L-Glutamine | 0,9<br>1 | 2,63      | 2,76      | 1,10      | 3,38      | 3,38      | 3,45   | 15,93  | 9,93   | 3,85   | 3,38   | 11,41  | 1,46      | 3,71      | 3,40      | 1,77      | 4,57      | 4,30      | 12,54  | 17,52  | 14,43  | 23,03  | 16,43  | 17,21  |
|             | 1,0<br>0 | 2,67      | 2,67      | 1,40      | 3,02      | 3,12      | 3,70   | 25,62  | 11,95  | 4,20   | 3,02   | 14,57  | 1,50      | 2,98      | 3,36      | 2,00      | 4,48      | 4,08      | 13,50  | 19,38  | 15,33  | 25,00  | 16,97  | 16,65  |
|             | 0,9<br>5 | 2,64      | 2,65      | 1,25      | 3,14      | 3,29      | 3,58   | 15,15  | 13,02  | 4,03   | 3,14   | 13,18  | 1,48      | 3,70      | 3,28      | 1,89      | 4,72      | 4,88      | 13,02  | 16,46  | 14,48  | 24,01  | 16,28  | 16,63  |

|              |          |           |           |      |      |      |      |       |       |      |      |       |      |           |           |      |           |           |       |       |       |       |       |       |
|--------------|----------|-----------|-----------|------|------|------|------|-------|-------|------|------|-------|------|-----------|-----------|------|-----------|-----------|-------|-------|-------|-------|-------|-------|
| L-Histidine  | 1,5<br>6 | 3,70      | 2,02      | 1,66 | 4,25 | 2,86 | 0,65 | 3,02  | 1,87  | 0,82 | 4,25 | 2,99  | 0,56 | 5,40      | 2,71      | 0,70 | 5,71      | 3,38      | 3,48  | 3,21  | 2,69  | 3,98  | 3,46  | 3,98  |
|              | 1,7<br>0 | 2,38      | 1,62      | 1,90 | 2,92 | 2,49 | 0,75 | 4,23  | 2,74  | 1,00 | 2,92 | 4,20  | 0,75 | 3,08      | 2,81      | 0,80 | 3,32      | 3,98      | 4,00  | 3,79  | 2,95  | 5,00  | 3,58  | 3,78  |
|              | 1,6<br>3 | 4,09      | 2,76      | 1,78 | 3,72 | 4,13 | 0,70 | 3,55  | 3,28  | 0,91 | 3,72 | 3,80  | 0,65 | 3,92      | 2,46      | 0,75 | 4,37      | 3,45      | 3,74  | 3,28  | 2,85  | 4,49  | 3,31  | 3,50  |
| L-Leucine    | 3,5<br>5 | 15,5<br>1 | 13,9<br>3 | 3,27 | 8,45 | 8,81 | 7,22 | 17,46 | 16,11 | 7,16 | 8,45 | 10,33 | 6,60 | 26,1<br>5 | 25,8<br>7 | 4,32 | 16,6<br>4 | 19,5<br>9 | 12,94 | 32,44 | 29,01 | 15,81 | 23,30 | 21,34 |
|              | 3,6<br>5 | 15,4<br>1 | 12,8<br>7 | 3,50 | 8,15 | 9,44 | 7,50 | 19,53 | 15,30 | 7,40 | 8,15 | 10,21 | 7,00 | 24,9<br>0 | 25,4<br>5 | 5,00 | 15,9<br>8 | 18,5<br>5 | 13,50 | 31,76 | 26,89 | 17,00 | 21,18 | 15,98 |
|              | 3,6<br>0 | 15,0<br>0 | 14,8<br>6 | 3,38 | 8,15 | 9,54 | 7,36 | 17,67 | 15,90 | 7,28 | 8,15 | 10,08 | 6,80 | 26,3<br>0 | 25,7<br>0 | 4,66 | 17,8<br>4 | 18,2<br>1 | 13,22 | 30,28 | 25,80 | 16,41 | 21,55 | 20,81 |
| L-Isoleucine | 0,2<br>6 | 2,02      | 0,98      | 0,43 | 1,44 | 0,93 | 0,27 | 1,68  | 1,22  | 0,26 | 1,44 | 1,07  | 0,21 | 3,02      | 16,2<br>2 | 0,10 | 2,50      | 1,44      | 1,33  | 2,25  | 1,91  | 2,31  | 1,63  | 1,88  |
|              | 0,3<br>5 | 1,30      | 0,83      | 0,60 | 0,94 | 0,83 | 0,40 | 3,85  | 1,52  | 0,60 | 0,94 | 1,53  | 0,30 | 1,95      | 1,87      | 0,30 | 1,39      | 1,76      | 1,50  | 2,58  | 1,88  | 3,00  | 1,78  | 1,39  |
|              | 0,3<br>1 | 2,12      | 1,43      | 0,52 | 0,94 | 1,43 | 0,33 | 1,88  | 1,71  | 0,43 | 0,94 | 1,34  | 0,26 | 2,47      | 1,61      | 0,20 | 1,93      | 1,43      | 1,41  | 2,07  | 1,82  | 2,65  | 1,69  | 1,66  |
| L-Lysine     | 0,6<br>7 | 2,15      | 1,71      | 1,07 | 2,03 | 1,74 | 0,55 | 2,40  | 1,58  | 0,92 | 2,03 | 1,81  | 0,53 | 3,38      | 1,92      | 0,54 | 3,90      | 1,78      | 1,86  | 2,85  | 2,66  | 3,06  | 2,67  | 2,09  |
|              | 0,7<br>5 | 1,60      | 1,43      | 1,40 | 1,73 | 1,68 | 0,65 | 3,62  | 1,62  | 1,20 | 1,73 | 1,60  | 0,75 | 2,72      | 1,95      | 0,80 | 3,55      | 2,11      | 2,00  | 2,68  | 2,52  | 3,50  | 2,74  | 1,63  |
|              | 0,7<br>1 | 2,43      | 2,03      | 1,23 | 1,91 | 1,99 | 0,60 | 2,49  | 2,04  | 1,06 | 1,91 | 1,92  | 0,64 | 3,34      | 1,75      | 0,67 | 3,22      | 2,00      | 1,93  | 2,33  | 2,44  | 3,28  | 2,61  | 1,95  |
| L-Asparagine | 0,7<br>7 | 0,00      | 0,00      | 1,47 | 0,00 | 0,00 | 0,37 | 3,09  | 4,89  | 0,41 | 0,00 | 3,77  | 0,47 | 0,00      | 0,00      | 0,50 | 0,00      | 0,00      | 2,74  | 1,34  | 8,71  | 5,70  | 1,92  | 6,91  |
|              | 0,9<br>0 | 0,00      | 0,00      | 1,80 | 0,00 | 0,00 | 0,50 | 3,23  | 4,52  | 0,60 | 0,00 | 3,30  | 0,60 | 0,00      | 0,00      | 0,70 | 0,00      | 0,00      | 3,00  | 3,39  | 8,02  | 6,00  | 1,29  | 6,26  |
|              | 0,8<br>4 | 0,00      | 0,00      | 1,64 | 0,00 | 0,00 | 0,43 | 2,18  | 4,00  | 0,51 | 0,00 | 3,72  | 0,54 | 0,00      | 0,00      | 0,60 | 0,00      | 0,00      | 2,87  | 2,75  | 8,14  | 5,85  | 2,50  | 6,50  |

|                 |          |      |      |      |      |      |      |      |      |      |      |      |      |           |      |      |      |      |      |      |      |      |      |      |
|-----------------|----------|------|------|------|------|------|------|------|------|------|------|------|------|-----------|------|------|------|------|------|------|------|------|------|------|
| L-Methionine    | 0,1<br>2 | 0,72 | 0,45 | 0,14 | 0,57 | 0,45 | 0,11 | 0,63 | 0,52 | 0,12 | 0,57 | 0,47 | 0,16 | 1,18      | 0,75 | 0,12 | 1,05 | 0,67 | 0,65 | 0,94 | 0,77 | 1,14 | 0,78 | 0,76 |
|                 | 0,2<br>0 | 0,52 | 0,40 | 0,30 | 0,41 | 0,43 | 0,20 | 0,78 | 0,61 | 0,30 | 0,41 | 0,62 | 0,25 | 0,85      | 0,76 | 0,30 | 0,64 | 0,81 | 0,70 | 0,95 | 0,78 | 1,40 | 0,81 | 0,74 |
|                 | 0,1<br>6 | 0,76 | 0,55 | 0,22 | 0,57 | 0,64 | 0,16 | 0,76 | 0,65 | 0,21 | 0,57 | 0,59 | 0,21 | 0,96      | 0,71 | 0,21 | 0,76 | 0,65 | 0,67 | 0,93 | 0,73 | 1,27 | 0,78 | 0,73 |
| L-Phenylalanine | 0,0<br>7 | 0,36 | 0,23 | 0,23 | 0,29 | 0,23 | 1,46 | 5,22 | 4,65 | 1,41 | 0,29 | 2,99 | 0,06 | 0,60      | 0,38 | 0,04 | 0,53 | 0,34 | 4,46 | 9,40 | 8,57 | 3,97 | 5,82 | 6,12 |
|                 | 0,1<br>5 | 0,26 | 0,20 | 0,40 | 0,21 | 0,22 | 1,60 | 6,45 | 5,24 | 1,60 | 0,21 | 3,10 | 0,10 | 0,43      | 0,39 | 0,07 | 0,32 | 0,41 | 5,00 | 9,04 | 8,32 | 5,00 | 6,07 | 6,11 |
|                 | 0,1<br>1 | 0,38 | 0,28 | 0,32 | 0,29 | 0,32 | 1,53 | 5,29 | 5,20 | 1,51 | 0,29 | 2,95 | 0,08 | 0,49      | 0,36 | 0,06 | 0,39 | 0,33 | 4,73 | 9,38 | 8,90 | 4,49 | 5,82 | 6,01 |
| L-Threonine     | 0,3<br>9 | 2,23 | 1,20 | 0,74 | 2,21 | 1,49 | 0,22 | 1,38 | 1,31 | 0,22 | 2,21 | 1,63 | 0,25 | 3,76      | 1,64 | 0,14 | 3,54 | 1,88 | 1,85 | 2,04 | 1,64 | 3,64 | 2,08 | 2,30 |
|                 | 0,5<br>0 | 1,47 | 0,88 | 0,90 | 1,61 | 1,37 | 0,30 | 4,82 | 1,83 | 0,40 | 1,61 | 2,40 | 0,40 | 2,01      | 1,67 | 0,30 | 1,94 | 2,29 | 2,00 | 2,47 | 1,81 | 4,00 | 2,25 | 2,29 |
|                 | 0,4<br>5 | 2,56 | 1,61 | 0,82 | 2,08 | 2,48 | 0,26 | 2,22 | 2,03 | 0,31 | 2,08 | 2,40 | 0,33 | 2,73      | 1,43 | 0,22 | 2,84 | 1,74 | 1,93 | 1,96 | 1,74 | 3,82 | 2,08 | 2,07 |
| L-Tryptophan    | 0,2<br>9 | 1,34 | 1,26 | 0,69 | 0,83 | 0,87 | 0,49 | 1,55 | 1,41 | 0,51 | 0,83 | 1,01 | 0,49 | 2,23      | 2,11 | 0,34 | 1,52 | 1,70 | 0,10 | 2,68 | 2,51 | 1,22 | 1,85 | 1,87 |
|                 | 0,4<br>0 | 1,37 | 1,19 | 0,90 | 0,82 | 0,93 | 0,65 | 1,63 | 1,30 | 0,30 | 0,82 | 0,99 | 0,50 | 2,12      | 2,12 | 0,50 | 1,44 | 1,69 | 0,30 | 2,22 | 2,37 | 1,60 | 1,79 | 1,78 |
|                 | 0,3<br>5 | 1,35 | 1,32 | 0,79 | 0,81 | 0,87 | 0,57 | 1,63 | 1,42 | 0,40 | 0,81 | 0,96 | 0,50 | 2,25      | 2,11 | 0,42 | 1,56 | 1,62 | 0,20 | 2,22 | 2,22 | 1,41 | 1,90 | 1,91 |
| L-tyrosine      | 0,9<br>4 | 7,08 | 4,71 | 1,78 | 5,65 | 4,58 | 0,71 | 2,21 | 1,88 | 0,59 | 5,65 | 1,65 | 1,48 | 11,6<br>8 | 8,00 | 1,07 | 9,26 | 7,11 | 1,58 | 3,33 | 2,94 | 2,62 | 2,67 | 2,71 |
|                 | 1,1<br>0 | 5,60 | 4,20 | 2,00 | 4,46 | 4,63 | 0,80 | 2,96 | 2,11 | 0,80 | 4,46 | 2,09 | 1,75 | 8,78      | 8,14 | 1,60 | 6,60 | 7,83 | 2,00 | 3,37 | 2,78 | 3,00 | 2,66 | 2,78 |
|                 | 1,0<br>2 | 7,96 | 5,89 | 1,89 | 5,30 | 5,78 | 0,76 | 2,40 | 2,30 | 0,69 | 5,30 | 1,79 | 1,62 | 10,1<br>5 | 7,79 | 1,34 | 8,10 | 6,92 | 1,79 | 3,10 | 2,81 | 2,81 | 2,57 | 2,61 |

|          |      |       |       |       |       |       |       |       |       |       |       |       |       |       |      |       |       |       |        |        |       |        |       |
|----------|------|-------|-------|-------|-------|-------|-------|-------|-------|-------|-------|-------|-------|-------|------|-------|-------|-------|--------|--------|-------|--------|-------|
| L-Valine | 58,8 | 175,2 | 170,3 | 122,1 | 139,0 | 317,9 | 656,7 | 615,4 | 345,9 | 122,1 | 494,2 | 93,1  | 278,7 | 302,7 | 75,0 | 237,0 | 295,7 | 606,1 | 1160,8 | 1015,7 | 752,5 | 1082,5 | 959,1 |
|          | 60,0 | 190,8 | 168,7 | 134,8 | 163,4 | 320,0 | 585,7 | 554,8 | 350,0 | 134,8 | 449,6 | 100,0 | 295,4 | 294,3 | 90,0 | 256,2 | 285,0 | 650,0 | 1079,6 | 938,5  | 800,0 | 992,6  | 923,1 |
|          | 59,4 | 175,1 | 176,1 | 120,8 | 136,9 | 318,9 | 676,7 | 596,1 | 347,9 | 120,8 | 432,1 | 96,6  | 300,9 | 300,4 | 82,5 | 270,6 | 281,6 | 628,1 | 1083,2 | 921,0  | 776,3 | 983,7  | 955,0 |

**Table S2. b:** Amino acid amount (µg) detected in the apical (AP) and basolateral (BL) compartment of ThinCert inserts after **24 hours** of exposure to bio-available fraction (BAF) in the different culturing conditions. RTdiMI (RTDI) and RTpiMI (RTPI) cell lines were exposed to 25% or 50% BAF diluted in L15/ex medium supplemented with 4% BSA or without any supplementation (no BSA). The same conditions were also used on control samples without cells (NC).

| BSA         | BSA  | BSA  | BSA  | BSA  | BSA  | BSA  | No BSA | No BSA | No BSA | No BSA | No BSA | No BSA | BSA  | BSA   | BSA   | BSA   | BSA   | BSA  | No BSA | No BSA | No BSA | No BSA | No BSA | No BSA |
|-------------|------|------|------|------|------|------|--------|--------|--------|--------|--------|--------|------|-------|-------|-------|-------|------|--------|--------|--------|--------|--------|--------|
| %BAF        | 25   | 25   | 25   | 25   | 25   | 25   | 25     | 25     | 25     | 25     | 25     | 25     | 50   | 50    | 50    | 50    | 50    | 50   | 50     | 50     | 50     | 50     | 50     | 50     |
| Cells       | NC   | RTDI | RTPI | NC   | RTDI | RTPI | NC     | RTDI   | RTPI   | NC     | RTDI   | RTPI   | NC   | RTDI  | RTPI  | NC    | RTDI  | RTPI | NC     | RTDI   | RTPI   | NC     | RTDI   | RTPI   |
| Compartment | AP   | AP   | AP   | BL   | BL   | BL   | AP     | AP     | AP     | BL     | BL     | BL     | AP   | AP    | AP    | BL    | BL    | BL   | AP     | AP     | AP     | BL     | BL     | BL     |
| L-Alanine   | 32,3 | 48,7 | 42,2 | 21,8 | 30,4 | 38,3 | 21,44  | 31,49  | 24,02  | 21,35  | 29,16  | 38,32  | 27,9 | 60,69 | 53,02 | 44,77 | 91,47 | 49,8 | 35,46  | 35,54  | 34,10  | 51,25  | 32,35  | 40,69  |
|             | 5    | 5    | 0    | 4    | 3    | 2    | 35,0   | 48,7   | 49,3   | 23,0   | 25,7   | 39,3   | 9    | 30,0  | 53,02 | 6     | 47,1  | 47,1 | 36,00  | 39,23  | 33,90  | 53,00  | 33,50  | 40,67  |
|             | 0    | 2    | 1    | 0    | 9    | 1    | 22,50  | 32,44  | 30,98  | 23,00  | 23,72  | 31,06  | 0    | 63,07 | 58,52 | 46,00 | 79,18 | 1    | 36,00  | 39,23  | 33,90  | 53,00  | 33,50  | 40,67  |
|             | 33,6 | 50,7 | 52,9 | 22,4 | 31,0 | 28,2 | 21,97  | 39,29  | 32,36  | 22,18  | 29,60  | 26,85  | 28,9 | 65,82 | 55,00 | 45,39 | 94,23 | 42,3 | 35,73  | 56,23  | 34,84  | 52,13  | 45,00  | 37,50  |
| L-Arginine  | 8    | 2    | 8    | 2    | 6    | 3    | 13,48  | 18,16  | 16,63  | 16,99  | 16,24  | 35,95  | 18,0 | 24,78 | 22,61 | 24,30 | 45,24 | 21,2 | 18,10  | 28,79  | 27,65  | 24,87  | 24,39  | 24,75  |
|             | 5    | 7    | 0    | 2    | 1    | 9    | 22,5   | 22,5   | 21,4   | 22,0   | 20,4   | 15,8   | 6    | 20,0  | 22,61 | 20,2  | 20,2  | 0    | 19,00  | 26,92  | 25,23  | 26,20  | 31,73  | 26,52  |
|             | 22,5 | 22,5 | 21,4 | 0    | 5    | 3    | 15,00  | 17,35  | 17,81  | 18,00  | 17,30  | 15,35  | 0    | 27,73 | 21,78 | 30,00 | 43,89 | 1    | 19,00  | 26,92  | 25,23  | 26,20  | 31,73  | 26,52  |
|             | 0    | 0    | 1    | 0    | 5    | 3    | 14,24  | 20,10  | 18,88  | 17,50  | 17,73  | 16,62  | 19,0 | 26,73 | 21,66 | 27,15 | 40,65 | 25,3 | 18,55  | 35,99  | 29,92  | 25,53  | 28,40  | 28,20  |
| L-Glutamine | 7    | 3    | 6    | 1    | 1    | 7    | 6,56   | 8,11   | 8,78   | 8,54   | 7,06   | 7,61   | 3    | 26,73 | 21,66 | 27,15 | 40,65 | 2    | 18,55  | 35,99  | 29,92  | 25,53  | 28,40  | 28,20  |
|             | 6,56 | 8,11 | 8,78 | 8,54 | 7,06 | 7,61 | 18,98  | 11,94  | 11,43  | 18,72  | 12,89  | 10,94  | 2,89 | 9,24  | 6,77  | 8,65  | 16,75 | 7,83 | 23,78  | 53,86  | 18,05  | 37,46  | 42,05  | 18,01  |
|             | 7,50 | 7,11 | 6,68 | 9,00 | 7,03 | 7,12 | 19,50  | 14,90  | 9,97   | 20,00  | 14,84  | 12,19  | 3,25 | 8,33  | 8,40  | 9,00  | 15,40 | 7,74 | 25,00  | 67,21  | 17,36  | 39,60  | 58,47  | 19,69  |
| L-Histidine | 7,03 | 9,09 | 6,56 | 8,77 | 7,68 | 6,09 | 19,24  | 13,86  | 12,16  | 19,36  | 13,86  | 12,20  | 3,07 | 8,32  | 6,62  | 8,82  | 17,85 | 7,70 | 24,39  | 72,98  | 18,01  | 38,53  | 53,60  | 20,00  |
|             | 3,95 | 5,65 | 5,39 | 4,02 | 5,45 | 4,49 | 3,37   | 3,92   | 4,84   | 4,40   | 3,70   | 7,63   | 3,79 | 5,45  | 5,01  | 4,35  | 11,21 | 4,72 | 2,96   | 7,67   | 5,65   | 4,78   | 6,33   | 5,01   |
|             | 4,50 | 5,77 | 4,90 | 5,00 | 5,56 | 4,49 | 4,00   | 4,68   | 4,21   | 5,00   | 4,54   | 3,69   | 4,00 | 5,90  | 4,53  | 5,00  | 12,10 | 4,90 | 3,25   | 7,36   | 5,23   | 5,00   | 8,29   | 6,34   |
|             | 4,23 | 5,79 | 4,65 | 4,51 | 5,10 | 4,63 | 3,68   | 5,44   | 4,84   | 4,70   | 7,57   | 4,44   | 3,90 | 4,83  | 4,88  | 4,68  | 11,64 | 4,16 | 3,10   | 7,84   | 6,91   | 4,89   | 7,00   | 5,50   |

|                 |              |           |           |           |           |           |       |       |       |       |       |       |           |       |       |       |            |            |       |       |       |       |       |       |           |       |       |       |       |       |       |
|-----------------|--------------|-----------|-----------|-----------|-----------|-----------|-------|-------|-------|-------|-------|-------|-----------|-------|-------|-------|------------|------------|-------|-------|-------|-------|-------|-------|-----------|-------|-------|-------|-------|-------|-------|
| L-Leucine       | 21,5<br>9    | 22,6<br>5 | 18,0<br>1 | 20,4<br>3 | 17,7<br>9 | 13,6<br>3 | 4,53  | 4,52  | 4,24  | 4,28  | 3,59  | 3,84  | 23,6<br>4 | 28,30 | 27,33 | 26,19 | 54,26<br>3 | 22,3<br>3  | 3,35  | 16,84 | 6,25  | 4,58  | 13,82 | 4,56  |           |       |       |       |       |       |       |
|                 | 22,5<br>0    | 21,9<br>9 | 17,9<br>8 | 22,0<br>0 | 17,8<br>4 | 13,0<br>1 |       |       |       |       |       |       | 25,0<br>0 | 30,38 | 29,87 |       | 30,00      | 48,58<br>0 |       |       |       |       |       |       | 21,2<br>0 | 3,50  | 15,77 | 5,33  | 5,40  | 19,05 | 5,20  |
|                 | 22,0<br>4    | 22,7<br>3 | 18,5<br>5 | 21,2<br>1 | 18,5<br>5 | 13,0<br>3 |       |       |       |       |       |       | 24,3<br>2 | 30,05 | 29,97 |       | 30,10      | 55,57<br>4 |       |       |       |       |       |       | 20,7<br>4 | 3,42  | 23,47 | 5,74  | 4,99  | 18,40 | 4,80  |
|                 |              |           |           |           |           |           |       |       |       |       |       |       |           |       |       |       |            |            |       |       |       |       |       |       |           |       |       |       |       |       |       |
| L-Isoleucine    | 2,98         | 3,21      | 2,87      | 2,69      | 3,24      | 2,38      | 5,74  | 6,33  | 6,10  | 5,28  | 5,74  | 5,64  | 2,53      | 4,29  | 4,08  | 3,50  | 7,96       | 3,10       | 7,31  | 28,18 | 8,55  | 10,48 | 22,45 | 7,60  |           |       |       |       |       |       |       |
|                 | 3,50         | 3,73      | 2,98      | 2,80      | 3,25      | 2,39      | 6,50  | 6,72  | 6,22  | 6,00  | 5,88  | 5,60  | 3,00      | 4,72  | 4,40  | 4,00  | 7,33       | 2,97       | 8,00  | 26,68 | 8,45  | 12,00 | 31,11 | 7,30  |           |       |       |       |       |       |       |
|                 | 3,24         | 3,68      | 2,75      | 2,74      | 3,03      | 2,45      | 6,12  | 6,61  | 6,14  | 5,64  | 5,41  | 5,59  | 2,76      | 4,34  | 4,06  | 3,75  | 8,09       | 3,78       | 7,65  | 37,81 | 8,66  | 11,24 | 27,50 | 7,10  |           |       |       |       |       |       |       |
| L-Lysine        | 6,73         | 7,12      | 5,64      | 6,89      | 6,70      | 4,75      | 2,81  | 2,03  | 1,84  | 2,47  | 2,28  | 2,93  | 5,31      | 8,53  | 5,84  | 8,74  | 16,60      | 5,81       | 2,04  | 7,28  | 2,80  | 3,41  | 2,22  | 2,62  |           |       |       |       |       |       |       |
|                 | 7,00         | 7,33      | 5,50      | 8,00      | 6,96      | 4,58      | 3,00  | 2,60  | 1,79  | 3,00  | 2,67  | 2,43  | 5,50      | 8,82  | 5,81  | 10,00 | 15,79      | 5,64       | 2,50  | 7,44  | 2,77  | 3,70  | 3,54  | 3,00  |           |       |       |       |       |       |       |
|                 | 6,87         | 7,20      | 5,07      | 7,44      | 6,26      | 4,22      | 2,90  | 2,71  | 1,81  | 2,73  | 2,70  | 2,37  | 5,40      | 8,06  | 7,33  | 9,37  | 16,00      | 6,00       | 2,27  | 11,24 | 3,28  | 3,55  | 2,60  | 2,80  |           |       |       |       |       |       |       |
| L-Asparagine    | 43,1<br>8    | 38,9<br>9 | 35,6<br>0 | 40,4<br>9 | 31,3<br>6 | 26,0<br>2 | 1,38  | 1,35  | 1,92  | 1,24  | 1,42  | 2,13  | 54,6<br>7 | 45,81 | 40,76 | 48,98 | 92,29<br>5 | 37,4<br>5  | 2,18  | 5,61  | 2,15  | 2,27  | 5,24  | 1,68  |           |       |       |       |       |       |       |
|                 | 45,0<br>0    | 34,6<br>1 | 32,8<br>6 | 43,0<br>0 | 30,7<br>0 | 28,3<br>9 |       |       |       |       |       |       | 56,0<br>0 | 46,70 | 39,65 |       | 55,00      | 87,77<br>7 |       |       |       |       |       |       | 36,5<br>7 | 2,50  | 5,24  | 1,82  | 3,00  | 4,82  | 2,25  |
|                 | 44,0<br>9    | 38,5<br>9 | 31,1<br>8 | 41,7<br>5 | 33,1<br>4 | 27,8<br>6 |       |       |       |       |       |       | 55,3<br>4 | 47,37 | 38,35 |       | 51,99      | 93,61<br>0 |       |       |       |       |       |       | 34,3<br>0 | 2,34  | 5,18  | 2,39  | 2,63  | 4,50  | 1,90  |
|                 |              |           |           |           |           |           |       |       |       |       |       |       |           |       |       |       |            |            |       |       |       |       |       |       |           |       |       |       |       |       |       |
| L-Methionine    | 2,19         | 2,42      | 1,98      | 1,88      | 2,20      | 1,71      | 1,82  | 1,68  | 1,66  | 1,53  | 1,42  | 1,72  | 1,61      | 3,11  | 2,45  | 2,57  | 6,28       | 2,34       | 1,19  | 8,03  | 2,65  | 1,85  | 5,07  | 1,86  |           |       |       |       |       |       |       |
|                 | 2,50         | 2,60      | 2,19      | 2,00      | 2,00      | 1,79      | 2,00  | 1,84  | 1,51  | 2,00  | 1,62  | 1,56  | 2,00      | 3,44  | 2,62  | 3,00  | 6,61       | 2,39       | 1,50  | 7,33  | 2,42  | 2,30  | 7,64  | 2,01  |           |       |       |       |       |       |       |
|                 | 2,34         | 2,26      | 2,15      | 1,94      | 2,04      | 1,68      | 1,91  | 1,98  | 1,71  | 1,76  | 1,63  | 1,66  | 1,80      | 3,41  | 2,54  | 2,79  | 6,38       | 2,40       | 1,34  | 12,19 | 2,48  | 2,07  | 6,60  | 1,70  |           |       |       |       |       |       |       |
| L-Phenylalanine | 22,5<br>6    | 24,7<br>1 | 19,5<br>8 | 21,3<br>8 | 19,7<br>1 | 15,6<br>0 | 19,83 | 23,75 | 14,30 | 21,79 | 20,56 | 18,28 | 20,1<br>9 | 34,44 | 34,76 | 29,34 | 62,39<br>2 | 25,9<br>2  | 25,32 | 24,85 | 36,30 | 32,72 | 20,25 | 29,50 |           |       |       |       |       |       |       |
|                 | 25,0<br>0    | 24,1<br>6 | 19,0<br>0 | 23,0<br>0 | 19,0<br>0 | 15,3<br>0 |       |       |       |       |       |       | 21,5<br>0 | 33,66 | 31,94 |       | 34,00      | 61,45<br>0 |       |       |       |       |       |       | 22,9<br>0 | 26,00 | 23,82 | 35,94 | 34,20 | 33,06 | 26,93 |
|                 | 23,7<br>8    | 25,2<br>0 | 20,8<br>1 | 22,1<br>9 | 18,9<br>4 | 14,3<br>7 |       |       |       |       |       |       | 20,8<br>4 | 37,62 | 31,10 |       | 31,67      | 63,50<br>7 |       |       |       |       |       |       | 20,9<br>7 | 25,66 | 36,74 | 35,07 | 33,46 | 26,20 | 25,40 |
|                 |              |           |           |           |           |           |       |       |       |       |       |       |           |       |       |       |            |            |       |       |       |       |       |       |           |       |       |       |       |       |       |
| L-Threonine     | 2,93         | 4,78      | 3,53      | 2,85      | 4,38      | 3,33      | 1,53  | 1,39  | 2,24  | 1,37  | 1,38  | 2,25  | 2,68      | 4,82  | 4,13  | 3,59  | 9,05       | 3,29       | 1,38  | 5,13  | 2,30  | 2,04  | 4,25  | 1,85  |           |       |       |       |       |       |       |
|                 | 3,00         | 4,51      | 3,85      | 3,00      | 4,27      | 3,20      | 1,75  | 1,81  | 1,54  | 1,50  | 1,80  | 1,38  | 3,00      | 5,41  | 3,84  | 5,00  | 9,53       | 3,31       | 1,50  | 4,62  | 2,15  | 3,10  | 5,22  | 2,21  |           |       |       |       |       |       |       |
|                 | 2,97         | 4,36      | 3,53      | 2,93      | 3,53      | 3,07      | 1,64  | 2,31  | 1,87  | 1,43  | 1,79  | 1,86  | 2,84      | 4,43  | 3,68  | 4,30  | 8,96       | 2,18       | 1,44  | 6,49  | 2,80  | 2,57  | 4,20  | 1,50  |           |       |       |       |       |       |       |
| L-Tryptophan    | 6,35<br>12,0 | 6,53      | 5,44      | 5,88      | 5,48      | 4,64      | 2,91  | 3,09  | 3,19  | 2,71  | 2,73  | 2,65  | 5,51      | 8,87  | 8,32  | 7,71  | 16,33      | 6,40       | 2,61  | 5,69  | 4,70  | 3,82  | 4,80  | 3,89  |           |       |       |       |       |       |       |
|                 | 0            | 6,49      | 5,64      | 6,00      | 5,46      | 4,57      | 3,00  | 3,24  | 3,21  | 3,00  | 2,68  | 2,78  | 6,50      | 8,81  | 7,65  | 9,00  | 16,07      | 6,23       | 3,00  | 5,50  | 4,82  | 4,00  | 7,56  | 3,75  |           |       |       |       |       |       |       |
|                 | 9,17         | 6,68      | 5,59      | 5,94      | 5,83      | 4,38      | 2,95  | 3,31  | 3,16  | 2,85  | 2,60  | 2,83  | 6,00      | 8,93  | 7,34  | 8,35  | 16,50      | 5,25       | 2,80  | 8,34  | 4,42  | 3,91  | 5,50  | 3,50  |           |       |       |       |       |       |       |
| L-tyrosine      | 19,5<br>5    | 23,5<br>8 | 19,1<br>7 | 17,0<br>1 | 19,6<br>5 | 16,7<br>7 | 7,74  | 9,12  | 8,84  | 7,15  | 8,13  | 8,87  | 14,9<br>4 | 28,24 | 26,38 | 23,59 | 57,78<br>9 | 21,9<br>9  | 11,14 | 14,56 | 10,60 | 17,66 | 13,03 | 10,45 |           |       |       |       |       |       |       |
|                 | 21,0<br>0    | 23,2<br>3 | 20,0<br>6 | 19,0<br>0 | 20,4<br>1 | 16,7<br>3 |       |       |       |       |       |       | 17,0<br>0 | 28,96 | 24,75 |       | 25,00      | 56,52<br>0 |       |       |       |       |       |       | 21,3<br>0 | 12,00 | 14,50 | 11,02 | 19,20 | 22,94 | 10,08 |
|                 |              |           |           |           |           |           |       |       |       |       |       |       |           |       |       |       |            |            |       |       |       |       |       |       |           |       |       |       |       |       |       |

|          |           |           |           |           |           |           |       |       |       |       |       |       |           |            |            |            |            |           |       |        |       |       |        |       |
|----------|-----------|-----------|-----------|-----------|-----------|-----------|-------|-------|-------|-------|-------|-------|-----------|------------|------------|------------|------------|-----------|-------|--------|-------|-------|--------|-------|
|          | 20,2<br>7 | 22,4<br>0 | 19,6<br>7 | 18,0<br>1 | 20,0<br>8 | 16,7<br>9 | 7,87  | 9,70  | 9,25  | 7,58  | 8,91  | 7,98  | 15,9<br>7 | 30,11      | 24,56      | 24,29      | 55,13      | 23,2<br>9 | 11,57 | 22,83  | 11,56 | 18,43 | 15,40  | 9,80  |
| L-Valine | 884,<br>4 | 951,<br>7 | 892,<br>6 | 822,<br>1 | 836,<br>3 | 761,<br>7 | 189,0 | 300,5 | 313,3 | 190,4 | 295,7 | 328,1 | 672,<br>4 | 1285,<br>9 | 1134,<br>5 | 1122,<br>5 | 2466,<br>7 | 965,<br>0 | 289,2 | 856,3  | 420,1 | 386,5 | 788,9  | 402,1 |
|          | 900,<br>0 | 886,<br>7 | 870,<br>7 | 850,<br>0 | 737,<br>5 | 772,<br>2 | 190,0 | 314,7 | 322,7 | 200,0 | 293,1 | 298,4 | 700,<br>0 | 1300,<br>9 | 1163,<br>2 | 1200,<br>0 | 2497,<br>2 | 402,<br>2 | 295,0 | 826,9  | 427,4 | 400,3 | 1177,2 | 402,2 |
|          | 892,<br>2 | 982,<br>9 | 922,<br>5 | 836,<br>1 | 883,<br>7 | 733,<br>6 | 189,5 | 309,3 | 304,8 | 195,2 | 276,3 | 289,2 | 686,<br>2 | 1297,<br>5 | 1170,<br>1 | 1161,<br>2 | 2407,<br>3 | 503,<br>3 | 292,1 | 1314,2 | 415,2 | 393,4 | 987,4  | 390,0 |

**Table S2.** c: Amino acid amount (µg) detected in the bio-available fraction (BAF) solution used for all the experiments and added to the system at time 0. BAF was diluted 25% or 50% in L15/ex medium supplemented with 4% BSA or without any supplementation and amino acid amount was determined.

|                                | ALA   | ARG   | GLN   | HIS  | LEU  | ILE   | LYS  | ASN  | MET  | PHE   | THR  | TRP  | TYR   | VAL     |
|--------------------------------|-------|-------|-------|------|------|-------|------|------|------|-------|------|------|-------|---------|
| <b>25% BAF IN L15/EX + BSA</b> | 29,24 | 16,03 | 16,21 | 1,82 | 1,98 | 35,61 | 3,08 | 1,97 | 0,85 | 11,16 | 1,38 | 3,40 | 8,35  | 455,04  |
| <b>50% BAF IN L15/EX + BSA</b> | 62,06 | 24,00 | 29,02 | 3,14 | 4,43 | 77,33 | 4,80 | 3,69 | 2,28 | 20,29 | 3,16 | 6,28 | 17,46 | 751,10  |
| <b>25% BAF IN L15/EX</b>       | 32,24 | 15,58 | 16,16 | 2,30 | 1,94 | 37,42 | 2,72 | 1,91 | 0,83 | 10,62 | 1,44 | 3,25 | 3,27  | 1079,33 |
| <b>50% BAF IN L15/EX</b>       | 66,85 | 23,00 | 30,88 | 4,25 | 4,18 | 60,39 | 4,63 | 3,53 | 2,38 | 20,04 | 3,13 | 6,05 | 5,74  | 2194,36 |
